# Supplementary material
Source: publisher figshare collection journal article supplement (https://frontiersin.figshare.com/ndownloader/files/22907288)
Supplement: Supplementary file 1 [file 22907288]

Table S2: plot topographic factors data.
Plot number	Aspect	Slope	Meanelev	Convex
1	279.384849	13.105061	1381.595	0.02920025
2	310.645205	25.495631	1379.915	-0.36048975
3	236.489745	23.363833	1379.541	-0.1857305
4	284.241947	11.38426	1380.417	-0.00464875
5	278.131946	10.877629	1380.038	0.10812575
6	313.434266	23.181671	1378.494	-0.270529
7	253.340856	19.203381	1377.542	0.05891925
8	309.464008	22.274993	1376.751	-0.141983
9	236.503346	20.404888	1376.461	-0.0990785
10	293.233021	13.992189	1376.952	-0.02899075
11	296.367359	8.29708	1383.372	0.52373125
12	345.003401	13.748696	1381.95	-1.34789647
13	201.015088	8.942757	1381.472	-1.64918661
14	300.678492	6.288725	1381.829	-0.5345203
15	289.801874	5.630041	1381.407	-0.39219222
16	339.180468	11.43721	1380.333	-0.77060929
17	275.085774	4.599879	1379.389	-0.82288707
18	359.29525	13.584077	1378.283	-1.22495284
19	175.369078	9.498963	1377.858	-1.22531833
20	341.878035	5.635709	1378.158	0.30853025
21	287.712537	16.336699	1385.404	-0.19914875
22	305.011189	21.64606	1383.843	-0.46447978
23	251.771059	18.361095	1383.22	-0.88652578
24	284.958534	13.313959	1383.413	0.11846842
25	278.917774	12.661993	1382.938	0.26672411
26	304.207925	17.007109	1381.922	0.03969275
27	278.957911	14.165345	1380.891	-0.02219696
28	312.886185	19.238391	1379.544	-0.61269695
29	242.945884	15.755398	1378.99	-0.69009691
30	288.691982	12.221464	1379.262	-0.06429275
31	305.444725	23.24753	1388.496	0.6570655
32	329.122011	15.715323	1386.129	-0.34695167
33	240.676759	8.376632	1385.297	-0.89635266
34	275.438755	11.110766	1385.524	0.28301102
35	295.320274	11.896166	1384.983	0.54250915
36	296.547013	11.567144	1384.077	0.63133633
37	314.634934	12.450556	1382.857	0.52564258
38	4.837117	17.706687	1380.672	-0.82846215
39	164.670515	11.832685	1379.977	-0.98900132
40	304.04769	4.081709	1380.52	0.318942
41	334.090117	16.418311	1390.809	-0.13131575
42	304.506914	21.980832	1388.445	-0.37533567
43	263.926059	18.822707	1387.499	-0.93614284
44	279.366689	11.642371	1387.507	0.20143174
45	307.077495	11.400253	1386.734	0.44168056
46	314.68331	9.312003	1385.562	0.48001318
47	327.781658	11.294871	1384.159	0.35778168
48	318.860594	22.122185	1381.843	-1.02285432
49	240.802533	17.943877	1381.108	-1.16808041
50	279.099789	10.687812	1381.705	-0.065156
51	300.698657	19.204669	1392.906	0.43263125
52	287.073287	17.396219	1391.562	0.08586034
53	290.353942	17.203151	1390.571	-0.36274382
54	274.832541	15.855615	1389.919	0.29822765
55	312.368351	18.187638	1388.72	0.33030542
56	344.739291	14.63848	1386.457	-0.52137564
57	336.6726	6.373624	1384.864	-0.70456014
58	6.926608	18.316567	1382.951	-1.59696833
59	169.15668	13.241479	1382.279	-1.61410818
60	282.342077	4.936162	1383.023	0.336401
61	303.628509	18.087015	1395.752	-0.53968125
62	285.358256	16.344505	1394.463	0.1894038
63	305.034558	16.550308	1393.224	-0.31113443
64	294.687526	10.108706	1392.042	0.08221637
65	330.675796	15.249346	1390.554	0.12395947
66	308.618747	20.862624	1388.235	-0.5385692
67	287.632389	18.330813	1386.582	-0.68987682
68	309.493702	25.803645	1384.59	-1.63904429
69	245.575452	22.26929	1383.894	-1.67780237
70	272.413782	13.850554	1384.649	-0.22016575
71	300.078557	34.672659	1400.057	0.61840925
72	265.981244	28.553584	1398.535	1.16876349
73	309.429996	31.868985	1396.789	0.39332923
74	300.023285	17.055077	1394.089	-0.24697025
75	308.994065	16.802505	1392.374	0.07231189
76	267.26851	21.57432	1391.514	1.16325459
77	312.136494	26.837548	1389.95	1.15066345
78	325.91289	15.472992	1387.174	-0.604757
79	244.652812	9.482191	1386.391	-0.88197025
80	254.533256	14.07118	1387.062	0.38486925
81	339.062381	24.457262	1403.799	-0.724644
82	262.218225	13.401357	1401.814	3.03239907
83	349.042716	25.720005	1399.587	1.84885887
84	317.918319	14.851872	1396.299	0.79218487
85	339.836281	15.659807	1394.022	0.70251983
86	78.198498	17.259189	1392.559	1.27157113
87	28.12025	20.626604	1391.062	1.33574024
88	302.559438	16.298754	1389.029	0.33135284
89	262.761362	16.301247	1388.508	0.31122153
90	249.446347	9.041542	1388.944	-0.294807
91	309.952901	47.866062	1408.905	0.923416
92	262.403819	34.448501	1405.732	-0.2685135
93	316.982014	41.072391	1402.997	0.6590285
94	279.329171	25.613684	1399.449	-0.38253675
95	331.117205	34.861989	1396.127	0.810978
96	25.34155	32.115636	1390.522	-0.76360275
97	135.352387	24.795699	1389.116	-0.3101965
98	229.629895	25.256577	1391.732	0.499387
99	300.189621	26.160702	1391.924	0.428761
100	265.301143	13.739857	1390.848	0.0909205
101	194.5541	32.568996	1289.655	-0.140185732
102	189.4878	28.920558	1295.464	0.37511746
103	324.8312	11.777099	1297.381	0.458443618
104	332.6383	20.972227	1294.879	0.144901745
105	333.872	18.886995	1291.643	0.018886948
106	340.1422	18.754992	1288.514	0.026383131
107	344.3743	24.14587	1284.764	-0.092176991
108	324.8441	22.622727	1280.931	-0.3901326
109	233.9635	19.06888	1280.264	-0.392915673
110	225.0056	19.738961	1282.54	-0.10654087
111	185.7586	35.017475	1290.808	-0.198528178
112	203.6782	32.584137	1297.196	0.102248908
113	300.7515	17.911096	1299.302	2.861674799
114	341.3917	23.479249	1296.449	0.03801603
115	335.62	17.01341	1293.022	-1.313320591
116	330.23	20.512977	1290.018	-1.029878968
117	334.2411	24.401037	1286.353	-1.854546106
118	327.8434	17.716044	1282.96	-3.605947643
119	223.8659	16.459632	1282.661	-2.681191972
120	223.3694	25.887613	1285.461	0.103570204
121	203.415	37.204913	1292.664	-0.177166692
122	191.2753	30.878533	1299.054	1.02535316
123	317.6574	11.745137	1301.283	3.849275565
124	322.4415	26.423666	1298.642	1.287778828
125	312.7328	23.404257	1295.227	-0.042091917
126	326.9584	22.238696	1292.058	0.069264108
127	333.9983	24.242211	1288.325	-0.757120771
128	317.1183	19.499625	1285.009	-2.303973201
129	226.3126	16.551036	1284.723	-1.313804889
130	189.9978	19.348526	1287.412	0.142074272
131	199.0681	32.795654	1295.221	-0.067688894
132	205.7971	30.511929	1300.916	1.10280866
133	285.5423	15.185296	1303.206	3.980920527
134	315.8211	20.980068	1301.476	2.390065568
135	324.5514	25.369739	1298.179	1.181905458
136	328.3731	24.121566	1294.344	0.587835587
137	334.4296	25.138261	1290.324	-0.508929843
138	336.7788	17.162625	1286.81	-2.180203549
139	206.9817	9.533705	1286.157	-1.54974664
140	197.8371	14.02026	1288.091	0.025885843
141	200.01	31.387523	1297.317	-0.04302558
142	190.4355	26.856183	1302.653	1.012450765
143	315.2796	5.617203	1304.813	3.764433386
144	341.7377	15.062676	1303.227	2.405635328
145	346.1192	21.689461	1300.028	1.333140884
146	341.5714	22.22424	1296.164	0.724843693
147	341.4604	24.551011	1292.061	-0.386552324
148	327.086	19.840229	1288.387	-2.084335803
149	239.3655	11.490427	1287.373	-1.786899785
150	199.9005	11.576798	1288.817	-0.029086779
151	193.4877	30.273569	1299.039	-0.087898835
152	204.3308	26.332669	1304.127	0.567409058
153	293.198	11.288767	1306.002	3.067120362
154	348.5245	18.717942	1303.981	1.425011287
155	350.3145	17.715477	1300.77	0.459516777
156	341.7916	20.817965	1297.403	0.442602322
157	342.8719	24.236451	1293.45	-0.400265389
158	342.2894	17.161034	1289.833	-1.902194299
159	236.6331	6.433508	1288.669	-1.730185405
160	216.7173	10.428823	1289.71	-0.057077869
161	206.8664	31.720576	1301.114	-0.084235343
162	201.7472	24.726953	1305.994	0.53806059
163	300.9394	10.490442	1307.658	2.930294889
164	327.4903	22.662685	1305.435	1.308246339
165	331.8567	21.526535	1301.958	0.267409821
166	350.0954	21.299481	1298.329	0.113255599
167	353.4418	22.654108	1294.351	-0.665014068
168	334.7444	16.749899	1290.936	-1.900266531
169	246.5747	10.073098	1289.943	-1.551513088
170	226.3219	12.015755	1291.029	-0.028677452
171	203.3466	30.030873	1303.652	-0.030806805
172	216.2435	26.666186	1308.326	0.999097176
173	289.2619	16.889147	1309.853	3.419736545
174	323.4933	21.833392	1307.747	2.185499201
175	339.6794	27.00436	1303.758	0.871843395
176	352.6865	25.980112	1298.971	-0.306866232
177	355.0123	20.054531	1294.747	-1.270851568
178	349.7409	13.190112	1291.779	-2.024641134
179	216.7249	7.590475	1291.132	-1.325850465
180	220.0926	15.239132	1292.662	0.072472741
181	207.2307	31.439323	1306.195	0.023377105
182	209.0139	24.760445	1310.925	2.694016959
183	311.6926	13.293981	1312.153	4.880569043
184	344.8753	21.789368	1309.455	3.167059453
185	353.4221	27.672449	1304.939	1.440038264
186	348.3035	27.353333	1299.804	-0.006508523
187	342.881	20.76924	1295.463	-1.041484815
188	334.207	14.029564	1292.53	-1.757919115
189	219.0933	8.181231	1291.947	-1.001086042
190	179.2643	11.951538	1293.512	0.071175435
191	193.5806	29.785839	1308.265	0.100179591
192	209.9482	28.738326	1313.397	0.573012338
193	324.9232	22.291032	1314.154	0.61172162
194	357.8111	26.587161	1310.068	0.228822397
195	358.9679	24.725194	1305.281	0.040443528
196	349.9108	24.647034	1300.73	-0.042622492
197	343.896	21.617735	1296.57	-0.132840977
198	347.5178	15.219837	1293.362	-0.266373673
199	196.2941	5.681712	1292.521	-0.237425434
200	194.8399	8.245521	1293.684	-0.031264363
201	19.888521	27.579954	1258.807	-1.17014831
202	10.504561	10.562569	1255.902	-0.44275928
203	7.426287	19.70341	1253.501	-0.45702209
204	93.458858	23.285256	1251.842	-1.32199138
205	24.824495	32.135884	1249.214	-1.34031265
206	347.271671	17.405278	1244.998	0.17545588
207	338.605428	11.719412	1242.535	0.15041302
208	325.336244	34.518765	1238.882	1.55358134
209	243.968887	28.589712	1237.094	1.53929693
210	319.452589	34.359567	1235.533	1.78796179
211	324.414491	28.37221	1259.5	-0.97675691
212	356.237705	17.285977	1255.878	0.58427061
213	359.228959	12.285864	1253.289	-0.6268925
214	20.79751	30.125911	1249.671	-1.32001473
215	82.260387	20.18534	1246.985	-1.32933538
216	19.528131	27.829924	1244.51	-1.29834208
217	88.802596	18.621043	1242.152	-1.43850736
218	5.093481	17.803463	1240.617	-0.77964221
219	25.572631	8.861747	1238.855	-1.59516683
220	26.72455	26.683374	1236.68	1.23469997
221	14.902203	25.76662	1260.432	-0.97617697
222	335.453191	19.37374	1256.702	0.97259368
223	327.991571	15.022257	1254.001	-0.33586525
224	328.054075	32.12309	1250.308	-1.10554426
225	272.979237	22.665218	1247.646	-1.13709231
226	324.618882	30.055635	1245.291	-1.08680657
227	267.883212	22.135942	1243.084	-1.18775925
228	320.917111	21.347112	1241.676	-0.46810523
229	282.447338	15.175777	1239.94	-1.28231698
230	314.975957	30.446803	1237.691	1.24659458
231	321.731132	35.319085	1261.993	-1.5024829
232	357.1995	20.067903	1257.513	1.01933373
233	353.748019	12.021808	1254.801	-0.26955075
234	15.909019	31.37324	1251.138	-1.09748347
235	102.807032	22.218128	1248.573	-1.17573999
236	4.528097	23.315024	1246.745	-0.76146058
237	49.457204	14.460852	1244.671	-0.95482555
238	280.085834	17.908022	1244.327	0.67391256
239	315.932627	23.169886	1242.581	-0.18023754
240	12.191591	23.858665	1239.286	1.0291683
241	21.634607	32.409071	1263.066	-1.50061628
242	328.636181	22.546784	1258.659	1.01445875
243	307.509276	16.556655	1256.045	-0.23540117
244	320.946771	35.009803	1252.514	-1.10231135
245	263.846502	27.630621	1250.102	-1.21076054
246	316.50468	28.678937	1248.416	-0.76324979
247	272.428974	22.300047	1246.411	-0.94754796
248	316.483515	11.097105	1246.052	0.62081752
249	351.676281	18.385158	1244.244	-0.26352889
250	313.594048	29.328828	1240.853	1.04571016
251	321.444308	29.042414	1263.674	-1.01249115
252	356.95394	20.185483	1259.812	0.74700713
253	342.814584	11.618587	1257.389	-0.42946449
254	4.011709	25.77294	1254.512	-0.8572762
255	83.827751	16.979659	1252.28	-0.99770165
256	278.578263	21.041902	1252.007	0.8065215
257	314.913491	26.879283	1249.998	0.62447889
258	318.819105	15.369005	1247.222	-0.2748232
259	316.396602	13.69524	1245.307	-1.2155987
260	330.529356	13.641848	1243.394	0.20935404
261	14.698924	25.120999	1264.82	-1.0089104
262	322.355544	23.272002	1261.18	0.63903983
263	290.616239	17.518535	1258.999	-0.42946873
264	316.753871	30.938364	1256.35	-0.89207027
265	268.82394	24.638776	1254.272	-1.07120704
266	312.549368	12.205176	1254.053	0.75390022
267	352.283752	21.184555	1251.991	0.60880714
268	319.016331	16.300715	1249.085	-0.33292941
269	316.217534	14.558357	1247.045	-1.30371052
270	315.875041	16.927213	1245.026	0.22201432
271	318.657337	28.727838	1266.03	-1.09571115
272	340.699124	14.291831	1262.87	0.70043805
273	323.296582	10.8176	1260.95	-0.24705516
274	289.223549	17.358586	1259.736	0.56262644
275	316.120305	22.859676	1257.761	0.41308086
276	259.945816	28.914059	1256.688	1.44116759
277	318.137853	35.233573	1254.536	1.41044658
278	293.915007	17.03239	1251.377	0.40148516
279	320.733811	22.517708	1249.221	-0.57653434
280	332.457957	13.324922	1246.618	0.13880842
281	22.63361	25.054779	1266.992	-1.08849458
282	322.771395	15.201145	1264.09	1.11537404
283	304.437322	12.679133	1262.407	0.3220791
284	331.786142	8.652417	1261.357	1.22249804
285	351.403389	17.701508	1259.422	1.07954752
286	115.70716	23.177015	1258.278	2.05035165
287	17.155134	30.940715	1256.031	1.99399871
288	352.820312	10.352474	1252.789	0.9960984
289	357.700015	18.509325	1250.564	-0.02853912
290	325.094292	14.658155	1247.903	0.13621741
291	319.994775	25.844378	1267.675	-1.07884106
292	251.464236	23.425177	1266.475	-1.11052102
293	320.430247	28.788539	1264.988	-1.11111011
294	249.64178	30.21892	1263.788	-1.58379117
295	321.129585	35.943215	1261.862	-1.5906688
296	310.635157	13.341536	1258.378	-0.31467923
297	331.368562	19.892194	1256.077	-0.33557329
298	3.320063	20.162619	1252.767	0.57810974
299	9.874776	10.400734	1250.546	0.55686345
300	19.305277	27.549076	1247.877	1.22747396
301	46.96817	15.924097	1439.959	0.079959817
302	60.04186	14.843858	1438.327	-0.250086624
303	140.63093	28.406818	1439.731	-0.216901324
304	134.63544	38.486483	1444.584	0.211915478
305	107.77884	30.295069	1448.252	0.349376982
306	110.84154	22.417255	1449.864	0.260890234
307	88.02283	15.85619	1450.548	0.159262494
308	84.24097	8.705484	1450.435	-0.01441074
309	147.22338	11.187911	1451.181	-0.04758779
310	136.59174	14.543209	1452.931	0.042162661
311	26.13694	20.347267	1438.128	0.198673114
312	57.12815	24.503266	1435.304	-0.209225025
313	122.47786	29.741656	1435.626	-1.029371134
314	124.77725	33.528554	1439.046	0.95937584
315	123.58915	33.466323	1442.757	2.439122574
316	120.79252	26.237183	1445.837	3.13759048
317	106.846	18.538279	1447.575	2.787219475
318	120.20233	14.559221	1448.692	2.053511969
319	118.28864	11.227459	1449.791	2.462003107
320	126.4271	14.340789	1451.016	-0.002935943
321	53.30906	28.175418	1435.214	0.192596721
322	40.08685	19.14218	1432.346	-1.672659472
323	136.78819	17.518689	1432.172	-2.934282178
324	134.21407	23.314962	1434.786	-1.790940106
325	136.39758	27.804664	1438.194	-0.580306403
326	125.12978	27.552575	1441.6	0.483581768
327	108.71712	24.411345	1443.828	0.535844443
328	112.26008	25.069243	1445.442	0.056503863
329	114.00778	21.863036	1447.127	0.920379387
330	137.49365	16.620551	1449.002	-0.057545649
331	65.82008	22.756132	1431.183	0.067905802
332	69.31431	17.986006	1429.757	-1.135151902
333	118.47502	15.962293	1429.87	-1.98354082
334	137.9302	20.854625	1431.966	-1.326597995
335	134.93259	23.041844	1434.877	-0.57295276
336	130.30763	23.687007	1437.795	-0.106877133
337	110.93467	20.938151	1439.896	-0.565754089
338	105.16444	23.826746	1441.154	-2.040895221
339	140.48193	27.588278	1443.703	-0.619659395
340	160.2086	20.279329	1447.398	-0.140865501
341	78.78973	22.756904	1427.23	-0.03820907
342	85.85754	17.286946	1426.713	-1.813581325
343	121.84059	16.296506	1427.372	-2.099295507
344	133.76906	19.845796	1429.389	-1.672917317
345	131.87541	21.217219	1431.931	-1.280051678
346	129.50495	22.387763	1434.535	-1.130740218
347	123.30063	18.432867	1436.743	-1.677914441
348	160.51247	14.54829	1438.667	-2.943226842
349	187.29671	28.861458	1442.425	-0.521394432
350	197.19514	26.280839	1447.504	-0.069619208
351	97.22191	17.834445	1423.618	-0.184644915
352	98.1825	13.511131	1423.988	-3.268331227
353	150.75219	16.725234	1425.423	-2.87782466
354	150.27168	11.852082	1427.579	-2.656602866
355	157.19254	17.161364	1429.889	-2.52341356
356	141.98978	13.439038	1432.228	-2.562399473
357	159.75102	19.456685	1434.774	-2.756390411
358	178.2888	20.366805	1438.249	-2.619131676
359	188.82639	32.751268	1443.267	0.982641713
360	203.28169	34.540821	1449.586	0.210480528
361	148.69445	13.208177	1421.477	-0.217293286
362	212.14105	16.052636	1423.44	-3.110637954
363	220.49033	24.720194	1426.209	-1.545511259
364	241.76848	23.752267	1428.99	-1.12536725
365	239.37242	22.962942	1431.079	-1.337172611
366	243.83262	15.405578	1432.744	-2.04312229
367	208.08084	21.905242	1435.116	-2.360669084
368	201.61019	25.119128	1439.056	-1.761514607
369	192.99899	34.032544	1444.518	2.255982832
370	180.32235	32.384779	1450.959	0.322539362
371	163.17057	22.847832	1420.313	-0.1765006
372	196.97178	29.228448	1424.877	-1.149569014
373	221.36974	25.818538	1429.302	1.912616854
374	227.77917	31.435827	1433.152	2.952396763
375	274.24258	24.31358	1435.026	2.333245837
376	257.81811	13.448914	1435.11	0.001416035
377	206.97766	17.846451	1436.786	-0.931553821
378	193.72662	24.842332	1440.467	-0.459967288
379	183.95737	28.952706	1445.467	3.150087246
380	179.25883	28.566729	1450.942	0.322343438
381	166.35247	27.910345	1419.097	-0.20827719
382	167.37664	33.843991	1424.941	-1.31431488
383	163.50326	23.5023	1430.287	2.609091418
384	157.30964	25.24378	1434.5	3.745258994
385	78.89137	13.168157	1436.504	3.174760662
386	239.30309	5.34637	1436.561	0.854636543
387	196.58852	13.081879	1437.84	-0.358727511
388	170.82739	20.296531	1440.725	-0.531444024
389	160.60482	26.203542	1444.841	2.256789043
390	150.78343	28.950797	1449.562	0.25226654
391	160.50915	31.992926	1417.432	-0.345382004
392	168.48919	33.067995	1423.559	0.022008281
393	158.24715	24.306363	1428.838	0.16593087
394	138.79135	20.846423	1432.356	0.152374673
395	133.93394	16.537375	1434.784	0.131007139
396	159.00436	10.40809	1436.578	0.093344387
397	164.9068	7.720646	1437.996	0.024295162
398	140.67061	15.155021	1439.617	-0.110669614
399	150.54365	26.592744	1442.795	-0.093848373
400	146.47081	25.098482	1446.925	0.063854586
401	227.66123	22.406851	1283.274	0.988921143
402	296.95224	20.226511	1283.848	0.920539383
403	222.70914	23.72709	1284.67	0.929716198
404	266.55026	12.461839	1286.233	0.453367593
405	220.83191	17.205565	1287.411	0.466998312
406	229.05015	8.75408	1289.034	0.069303152
407	223.28789	9.832352	1290.162	0.079008102
408	205.14458	8.548682	1291.447	-0.189663938
409	237.43042	4.623674	1292.298	-0.188638014
410	262.33225	8.715469	1292.587	0.226760859
411	151.32517	22.442328	1283.878	1.112344931
412	264.76186	5.666465	1285.309	-1.102477427
413	189.7836	11.248739	1286.216	-0.796988579
414	222.18603	8.438126	1287.661	-0.677263705
415	216.99612	9.895021	1288.904	-0.751490342
416	224.57387	12.402311	1290.374	-0.556225033
417	244.29274	9.782573	1291.515	-0.549917776
418	230.19872	11.221788	1292.509	-0.516160484
419	255.07401	8.855941	1293.33	-0.112015488
420	240.95318	6.379445	1293.795	0.046860582
421	231.71034	26.669009	1284.937	1.113487393
422	267.66135	12.145415	1286.427	-0.642943008
423	227.89584	15.749891	1287.387	-0.294798747
424	231.54723	10.403864	1288.876	-0.163786965
425	225.70016	11.532564	1290.157	-0.221328349
426	213.31778	10.747683	1291.651	0.014738031
427	235.46903	7.130655	1292.777	0.02885523
428	217.47274	8.818834	1293.719	0.033733081
429	248.05803	5.574694	1294.488	0.421091045
430	248.37586	7.690272	1294.908	0.048825601
431	161.99842	22.620491	1286.292	1.129251923
432	303.13055	9.08556	1287.637	-0.906141748
433	190.38121	14.155937	1288.606	-0.525823838
434	230.82937	9.351939	1290.225	-0.237148043
435	219.01208	11.259016	1291.51	-0.244479626
436	226.8861	27.189063	1293.952	1.044203468
437	288.2025	23.186819	1295.045	1.065664054
438	239.40778	9.263395	1294.879	-0.060887343
439	246.52906	8.339176	1295.585	0.277579676
440	263.06424	5.466092	1295.924	0.220983548
441	235.18803	28.940604	1287.958	1.13908958
442	275.75217	17.342564	1289.305	-0.846377667
443	232.95027	20.340596	1290.233	-0.46676278
444	242.7333	11.878438	1291.79	-0.169887342
445	229.85734	13.007979	1293.01	-0.178398598
446	168.24591	22.175129	1295.397	1.116090235
447	31.54228	17.335707	1296.442	1.130670529
448	238.8838	8.710692	1296.236	-0.014129117
449	247.11401	8.027708	1296.906	0.301964257
450	268.43325	10.392	1297.204	0.223921523
451	195.64035	14.957734	1290.388	0.673536052
452	266.73182	8.805647	1291.431	-0.620776498
453	217.44491	11.957652	1292.277	-0.254416355
454	263.47053	9.003926	1293.132	-0.514353549
455	198.03246	13.409159	1294.229	-0.540283553
456	238.75716	7.999141	1295.626	-0.179591296
457	220.19083	9.717192	1296.613	-0.162998088
458	247.1225	7.80824	1297.516	-0.117845759
459	237.58005	8.380536	1298.172	0.195520775
460	248.608	9.428163	1298.866	-0.063671606
461	241.29093	23.625098	1292.508	0.696651087
462	270.02131	16.16749	1293.515	-0.588988889
463	241.31884	17.670202	1294.262	-0.242640528
464	270.79447	16.819711	1294.989	-0.411982661
465	234.53551	19.377016	1295.956	-0.406610743
466	254.14258	12.307207	1297.237	-0.058308253
467	238.14738	13.405366	1298.152	-0.047260824
468	254.16604	10.424412	1299.023	0.003374675
469	246.56826	10.611085	1299.642	0.264195541
470	247.4468	7.984786	1300.279	-0.05696375
471	286.16319	23.014529	1296.254	-0.789430497
472	256.13351	11.888173	1295.953	-0.357178497
473	247.67929	11.952435	1296.607	-0.044608665
474	265.88634	8.635074	1297.053	-0.31956348
475	215.10436	11.840999	1297.913	-0.320512448
476	262.2207	7.9881	1298.8	-0.338225793
477	212.48123	10.987772	1299.639	-0.368300412
478	254.12639	8.450949	1300.606	-0.14512528
479	242.19247	8.50441	1301.152	0.036648592
480	249.53775	11.295097	1301.843	-0.176133285
481	345.64393	13.870862	1298.301	-0.764483089
482	257.22799	11.690741	1297.982	0.605548528
483	249.5131	12.026808	1298.583	0.887608508
484	269.23086	15.090034	1298.973	0.639203739
485	238.70345	17.145094	1299.772	0.620432732
486	268.07626	14.771364	1300.596	0.573932738
487	239.56367	16.491146	1301.366	0.507731155
488	260.50365	10.859843	1302.25	0.692757745
489	252.43857	10.565068	1302.685	0.785548953
490	239.94167	6.798771	1303.234	-0.164013363
491	300.77899	33.78532	1301.083	-1.755127541
492	241.78952	14.662045	1300.11	-0.283786067
493	270.60513	13.13583	1300.699	-0.290598818
494	234.19135	20.98375	1301.754	-0.640532288
495	281.38371	18.33107	1302.525	-0.633501296
496	230.2433	30.654501	1304.031	-1.32037994
497	297.17974	28.323592	1304.737	-1.311688188
498	230.78341	33.498064	1305.635	-1.650385919
499	305.2128	32.352485	1305.946	-1.653351346
500	240.52069	17.902984	1304.991	-0.663460998
